# Supplementary material for: Magnetoencephalography Imaging Reveals Abnormal Information Flow in Temporal Lobe Epilepsy
Source: PubMed Central journal article supplement (PMC9131359; doi:10.1089/brain.2020.0989), 2022-05-12
Supplement: Supp_Data.pdf [file Supp_Data.pdf]

## Supplemental Materials:

### MEG Imaging reveals abnormal information flow in TLE

Kiwamu Kudo, Hirofumi Morise, Kamalini G. Ranasinghe, Danielle Mizuiri, Abhishek S. Bhutada, Jessie Chen, Anne Findlay, Heidi E. Kirsch, and Srikantan S. Nagarajan

#### 1. Peak frequency distribution around the alpha band

Distributions of peak frequencies around the alpha band (8–12 Hz) for each participant was detected, and their means obtained by averaging over each group were shown in Figures 1 D–E in the main text. We employed the method described in Mahjoory et al. (2020) for detecting the peak frequencies: first we estimated aperiodic component of PSD such as  $1/f$  noise between 1 and 45 Hz using the FOOOF algorithm (Haller et al., 2018), and then subtracted it from the original PSD. After that, we applied the MATLAB ‘findpeaks’ function to the corrected PSD and extracted the frequency with maximum PSD amplitude. For several participants not having peak frequency within the range of 8–12 Hz on several ROIs, a peak frequency with the strongest power or a frequency with maximum power in the range of 6–14 Hz was defined as a peak frequency.

#### 2. Distances between brain regions based on Brainnetome Atlas

In the main text, we mentioned distances between brain regions in the context of showing the feature of the PTE matrices (e.g., Figs. 2C and F). Here we show how we estimated the distances between ROIs based on the Brainnetome atlas dataset.

The binary data of structural connections between brain regions for Brainnetome Atlas (Fan et al., 2016) are provided as a csv file at the Brainnetome web page. It also provides MNI coordinates for each ROIs as an xlsx file<sup>1</sup>. Based on these data, we estimated shortest-path length between brain regions. First we calculated euclidean distances between directly connected ROIs using their MNI coordinate values and obtained a distance-weighted

---

<sup>1</sup>Tables 1 and 2 are based on the xlsx file.

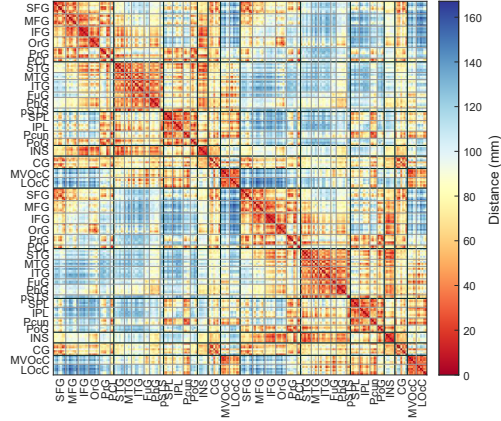

Figure S1: Distances between brain regions evaluated based on Brainnetome Atlas database.

matrix. After that, for all the pairs of ROIs, the length of the shortest possible path between the ROIs was computed by Floyd-Warshall algorithm that is implemented in a MATLAB toolbox, Brain Connectivity Toolbox (Rubinov and Sporns, 2010).

Figure S1 shows the the obtained shortest-path lengths. By comparing the shortest-path-length matrix (Fig. S1) with the PTE matrices (e.g., Figs. 2C and F), we can find that large information flow shown in the main text appears between brain regions with short distance less than approximately 8 cm (having warm color).

### 3. Normalized phase transfer entropy (NPTE) in the beta band

Computation results of PTE for beta band are shown in Figure S2. In beta band, information outflow increases in the superior frontal gyrus and orbital gyrus, and it decreases in the cuneus and occipital gyri (Fig. S2G). On the other hand, information inflow decreases in the middle and inferior frontal gyri (Fig. S2H).

### 4. Directional phase transfer entropy (dPTE)

In the main text, we have focused on the results on regional dPTE for the delta-theta and alpha bands. Here we show dPTE matrices for all the

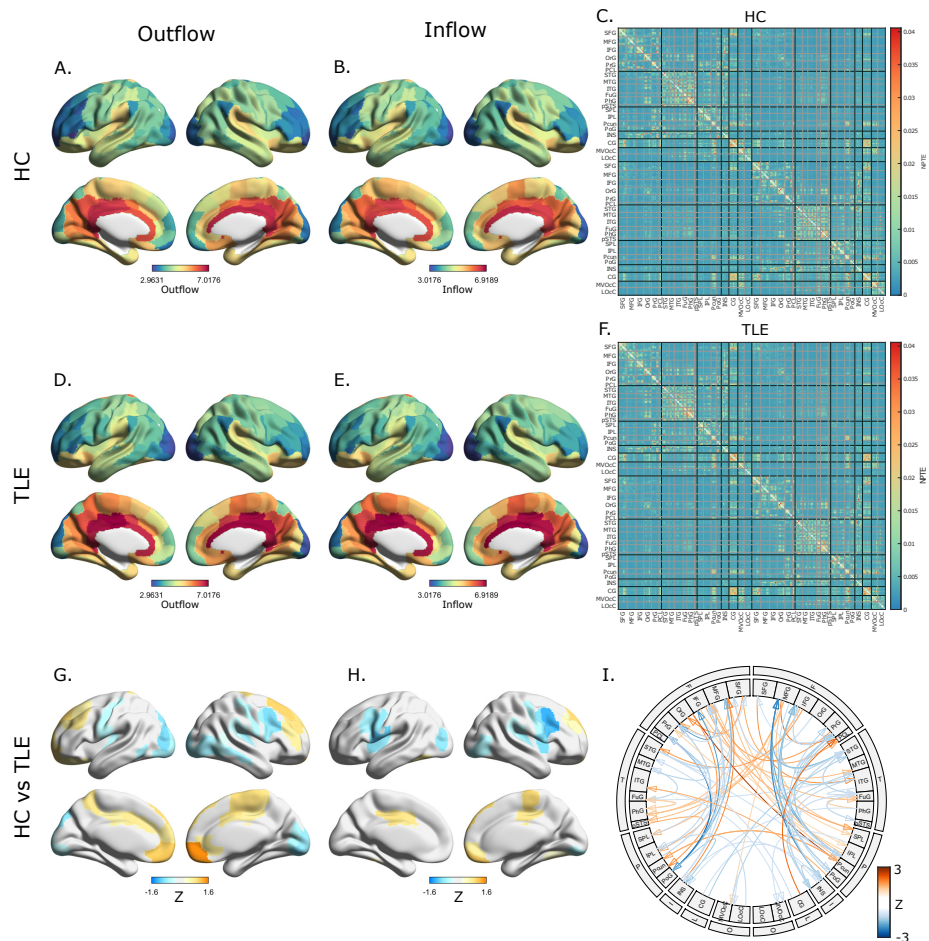

Figure S2: Information flow patterns in the beta band based on normalized phase transfer entropy (NPTE). Regional information out- and in-flow patterns for HC (A,B) and TLE (D,E), and average NPTE matrices for HC (C) and TLE (F). (*Bottom row*) Beta-band disrupted information flow. Regional information out- and in-flow patterns (G and H) in TLE compared with HC. The color depicts the mean  $Z$  scores that survived in the ROI-wise comparison of regional NPTEs between groups using permutation tests, and colors in orange indicate increased information flow. The colormaps are thresholded at 5% FDR. *Panel I:* Information flow connectogram in TLE compared with HC. The color depicts the average  $Z$  scores which are thresholded by  $t$ -tests with 0.1%-FDR correction. Only links with maximum absolute value of average  $Z$  scores between ROIs within each module were displayed.

frequency bands and regional dPTE in the beta band.

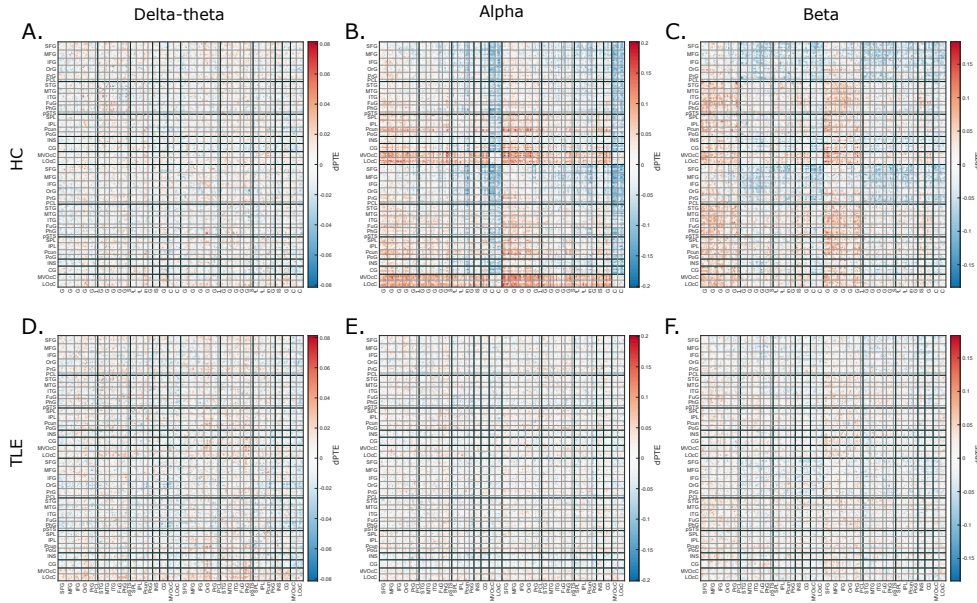

Figure S3: Average dPTE matrices for HC and TLE in the delta-theta (A,D), alpha (B,E), and beta (C,F) bands. For comparisons between HC and TLE, the colorbar ranges are aligned between (A) and (D), (B) and (E), and (C) and (F), respectively.

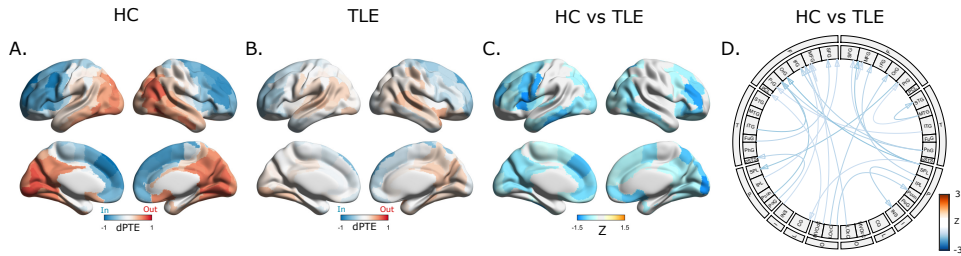

Figure S4: Beta-band regional directionality of information flow for HC and TLE (A and B). Red (blue) indicates outflow (resp. inflow) directionality. (C) Disrupted directionality patterns in TLE as the  $Z$ -score map. The color depicts the average  $Z$  scores that survived in the ROI-wise comparison of regional dPTEs between groups using permutation tests with 5%-FDR correction. Blue (orange) denote decreased (resp. increased) directionality. (D) Disrupted information directionality depicted as connectograms. The color depicts the average  $Z$  scores thresholded by  $t$ -tests with 1%-FDR correction. Only links with maximum absolute value of average  $Z$  scores between ROIs within each module were displayed.

The dPTE matrices for delta-theta, alpha, and beta bands are shown in Figure S3. It should be noting that the dPTE matrix is an anti-symmetric

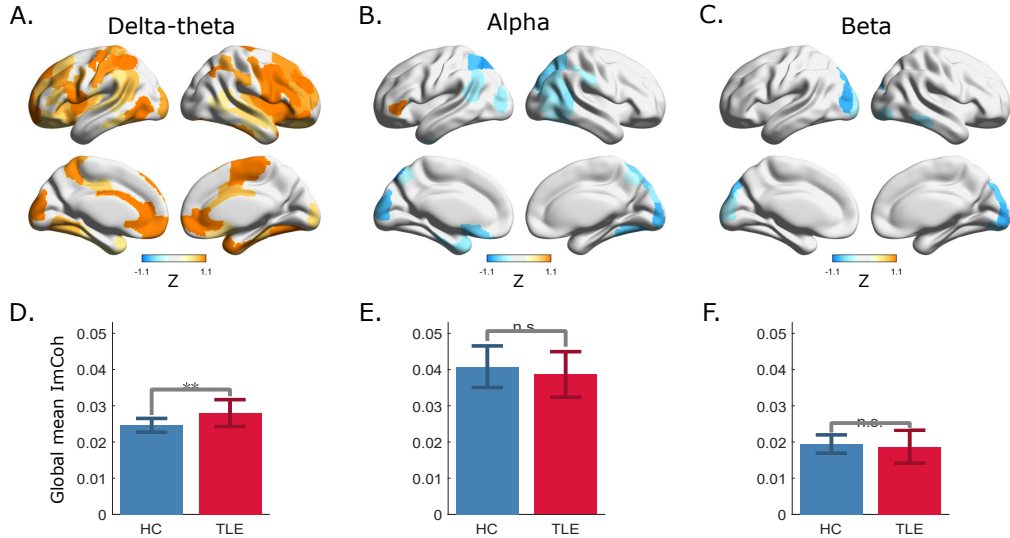

Figure S5: (A,B,C) Neural synchrony evaluated using ImCoh in TLE compared with age-matched HC. The color depicts the mean Z-score maps from the ROI-wise comparison of global imaginary coherence between groups in the delta-theta, alpha, and beta bands. Blue indicates hyposynchrony, and orange indicates hypersynchrony. The color maps are thresholded at 5% FDR ( $n = 19$ , TLE;  $n = 20$ , age-matched HC) after permutation tests. (D,E,F) Mean global synchrony estimated by using ImCoh averaged across the 210 Brainnetome cortical regions for the delta-theta, alpha, and beta bands. Significant hypersynchrony was observed in TLE in delta-theta band (\*\* $p < 0.01$ ,  $t$ -tests). The data are shown as mean  $\pm$  SD (arbitrary units).

one. The regional dPTE in the beta band for HC and TLE, and their comparisons are shown in Figure S4.

## 5. Neural Synchrony

Neural synchrony between ROI-level brain areas was evaluated by computing the imaginary part of the coherence ‘ImCoh’. The coherence for a pair of source timecourses,  $x$  and  $y$ , within a frequency band  $B$  was defined by

$$\text{Coh}_{xy} = \frac{\sum_{k=1}^K \sum_{f \in B} X_k(f) Y_k^*(f)}{\sqrt{\sum_{k=1}^K \sum_{f \in B} |X_k(f)|^2 \sum_{k=1}^K \sum_{f \in B} |Y_k(f)|^2}}, \quad (\text{S1})$$

where  $X_k(f)$  and  $Y_k(f)$  are the  $k$ -th windowed Fourier transforms of  $x$  and  $y$ , respectively (Nolte et al., 2004).  $K$  is the total number of windows. We

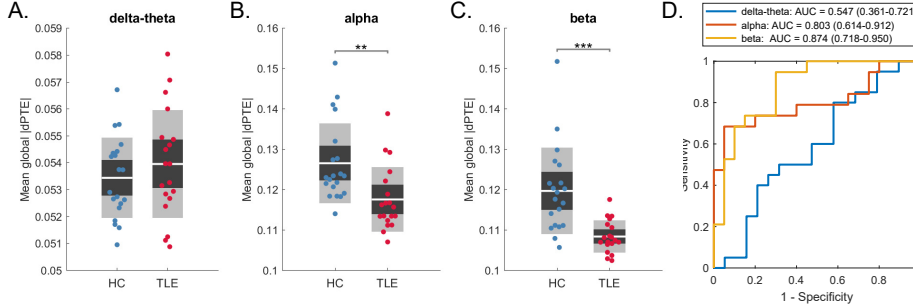

Figure S6: (A,B,C) Group comparisons of mean global strength of dPTE in the delta-theta, alpha, and beta bands. Significant difference was observed in the alpha band (\*\* $p = 0.0036 < 0.01$  in permutation test) and beta band (\*\* $p = 1.8 \cdot 10^{-4} < 0.001$  in permutation test). There was no significant difference in the delta-theta band. (D) ROC curves of the global strength of dPTE for the delta-theta, alpha, and beta bands.

used Hanning window as a window function, the length of which was 3.41 sec ( $2048/f_s$ ).  $\text{ImCoh}$  is the imaginary part of  $\text{Coh}_{xy}$ , and we defined it as  $\text{ImCoh}_{xy} = |\text{Im Coh}_{xy}|$ . The connectivity strength at each ROI, regional  $\text{ImCoh}$ , was estimated by averaging across all Fisher's  $Z$ -transformed  $\text{ImCoh}$ s (Guggisberg et al., 2008), i.e., using  $\tanh[\frac{1}{N_{\text{ROI}}-1} \sum_y \tanh^{-1} \text{ImCoh}_{xy}]$ .

In patients with TLE, neuronal synchrony within the alpha and beta bands was reduced (hyposynchrony) compared to controls, whereas neuronal synchrony within the delta-theta band was increased (hypersynchrony) compared to controls. Anatomically, alpha hyposynchrony was found especially in posterior parietal and occipital regions (Fig. S5B). In contrast, delta-theta hypersynchrony was found especially in frontal regions (Fig. S5A). Interestingly, these distribution patterns of hypo- and hyper-synchrony are quite similar to those observed in MEG in AD patients (Ranasinghe et al., 2020).

## 6. Supplementary results for NPTE and dPTE

### 6.1. Mean global strength of PTE directionality

Like  $\text{ImCoh}$ , a mean global measure averaged over all the ROI pairs (i.e., edges) can be defined for the directionality of phase transfer entropy (dPTE). Since dPTE takes both positive and negative value, it is appropriate to define such a scalar measure by taking an average of absolute values of dPTE-matrix components (i.e.,  $|\text{dPTE}|$ ). This quantifies global strength of PTE directionality. Here we show group comparisons of the strength between HC



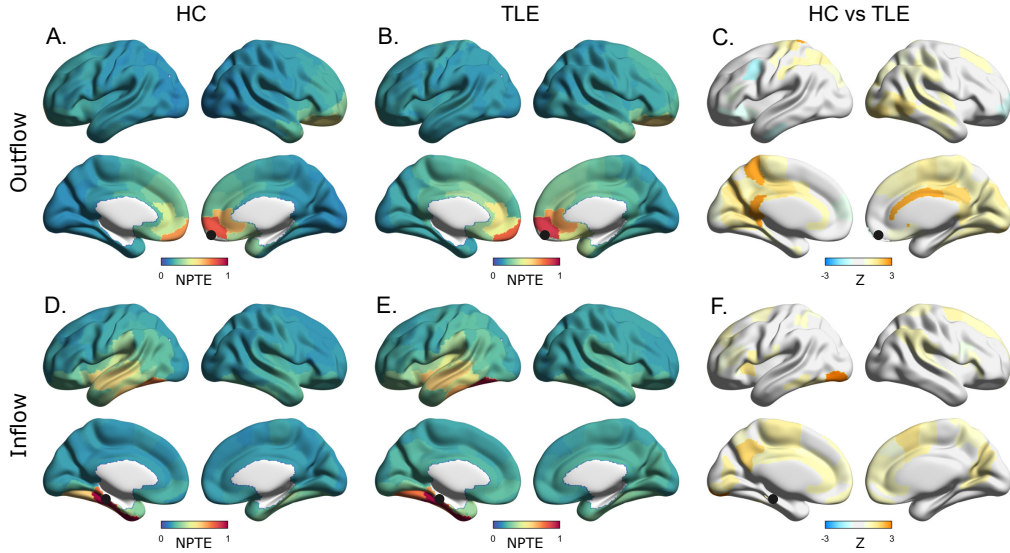

Figure S7: Group comparison of alpha-band seed-based PTE out- and in-flow between HC and TLE. Seeds for PTE outflow and inflow were chosen based on maximal group differences in  $Z$ -scores between HC and TLE across the entire matrix. For PTE outflow, the seed region was the orbital gyrus [medial area 11]. For PTE inflow, the seed region was the left lateral posterior parahippocampal gyrus. (see Figs. 2G and H in the main text). The seed ROIs were denoted as black filled circles. For the NPTE rendering (A, B, D, and E), a converted quantity,  $\tanh[\text{NPTE}(i)/(\text{NPTE}_{\max}/3)]$ , was used for visualization, where  $\text{NPTE}_{\max} = \max_{j=1, \dots, 210} \text{NPTE}(j)$ . (C, F): Information flow from and into the seed regions in patients with TLE were larger than those in HCs. The color maps which represent  $Z$  scores are thresholded at 5% FDR after permutation tests. Significant statistical difference was observed between the groups. The large difference in the regional PTE outflow at the right orbital gyrus [medial area 11] mainly originates in the information flow into right cingulate gyrus [rostroventral area 24], left precuneus [medial area 5], and left cingulate gyrus [ventral area 23] (mean  $Z$ -scores in these regions are larger than 2). The large difference in the regional PTE inflow at the lateral posterior parahippocampal gyrus mainly originates in the information flow from left inferior occipital gyrus (mean  $Z$ -scores in this region is larger than 2).

and TLE for the delta-theta, alpha, and beta bands. The results were shown as box plots. A Matlab tool 'notBoxPlot' (Campbell, 2016) was used for making the box plots.

There was no significant difference between HC and TLE in the delta-theta-band global directionality strength (Fig. S6A). On the other hand, significant reductions in the directionality strength in TLE were observed for the alpha and beta bands (Figs. S6B and C). It is worth noting that these reduc-

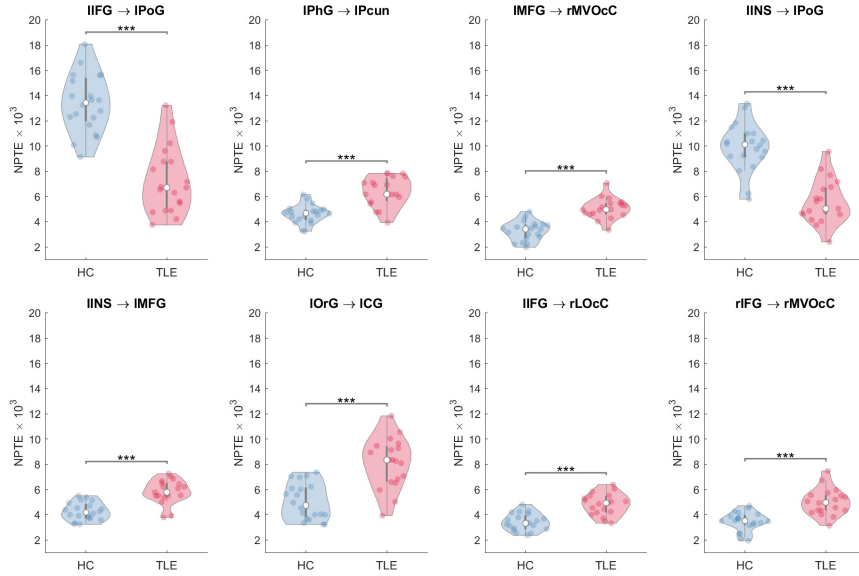

Figure S8: Group comparison of several components in the alpha-band NPTE matrix (Figs. 2C and F) between HC and TLE. The comparisons at the ROI pairs (i.e., edges) that have large mean absolute  $Z$  scores ( $> 2$ ; see Fig. 2I in the main text) were depicted. Clear discrimination between the groups with  $p < 0.001$  in the permutation test for NPTE values was observed at all the selected ROI pairs. The panels are arranged from the upper left in descending order of absolute value of  $Z$  score.

tions do not represent information-flow reduction in TLE. As we mentioned in the main text in the context of comparing the results of alpha-band dPTE with those of NPTE (e.g., Figs. 4G-H and Figs. 2G-I), the directionality-strength reductions rather originate in cancellation between the larger information out- and in-flow in TLE compared with HC (see Figs. 2G-I).

To check performance of mean global measures for TLE/HC discrimination, Receiver Operating Characteristic (ROC) curve analysis was also performed (Fig. S6D). Logistic, non-parametric method (Qin and Hotilovac, 2008) was used for their Area Under Curve (AUC) estimates. The alpha- and beta-band mean global  $|dPTE|$  have a potential to become a good scalar diagnostic measure for TLE in the sense that AUC is greater than 0.80 (Fig. S6D).

## 6.2. Seed-based PTE

In the main text, we investigated regional information outflow and inflow based on PTE matrix. Such an investigation is effective and convenient for



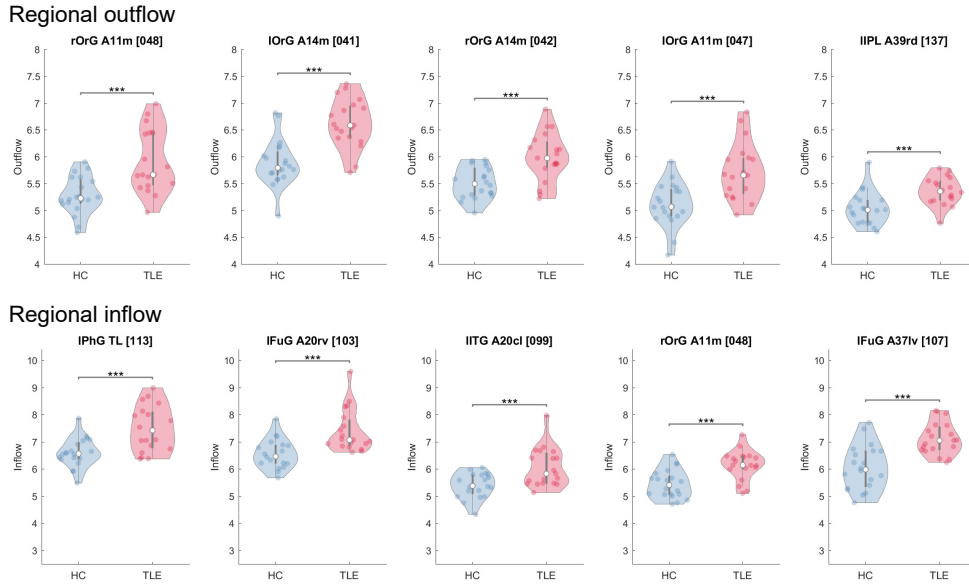

Figure S9: Group comparison of alpha-band regional NPTE outflow (Figs. 2A and D) and inflow (Figs. 2B and E) between HC and TLE. Clear discrimination between the groups ( $p < 0.001$  in the permutation test) were observed at 7 and 9 ROIs for regional outflow and inflow, respectively. The comparisons at 5 ROIs among them that have top 5 absolute values of  $Z$  score (Figs. 2G or H) were depicted, being arranged from the left in descending order of the values.

data-dimension reduction and regional comparisons. There is however yet another approach to explore regional features: considering seed-based connectivity. Detailed consideration of seed-based connectivity is out of scope in this paper, but here we exemplify seed-based PTEs and their comparisons between HC and TLE; two ROIs where the greatest inflow and outflow difference within the alpha band were observed (see Figs 2G and H in the main text) were picked up as seeds.

Figure S7 shows the results. Information flow from and into the seed regions in patients with TLE were larger than those in HCs (Figs. S7C and F), reflecting aggregate increases in the outflow and inflow at the seed regions in TLE (Figs. 2G and H). This seed-based analysis further clarifies that the aggregate increases emerged in a region-specific way; several regions mainly contribute to the increases. This kind of seed-based approach, especially by putting a seed on ROI which highly correlates with clinical measures, such as spike frequency and duration of epilepsy, might be useful to investigate

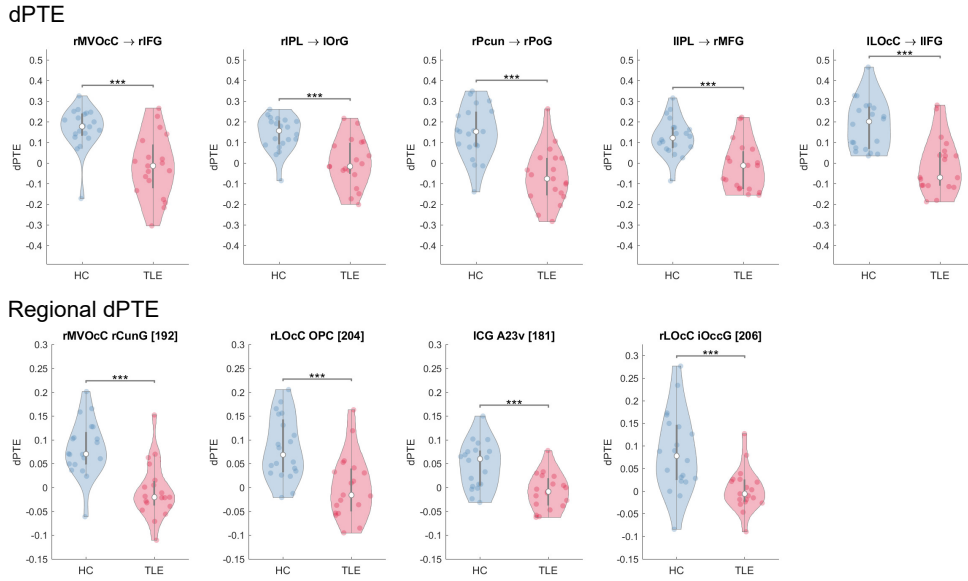

Figure S10: (*Upper panels:*) Group comparison of several components in the alpha-band dPTE matrix (Figs. S3B and E) between HC and TLE. The comparisons at the ROI pairs (i.e., edges) that have large mean absolute  $Z$  scores ( $> 1.6$ ; see Fig. 4H in the main text) were depicted. Clear discrimination between the groups with  $***p < 0.001$  in the permutation test for dPTE values was observed at all the selected ROI pairs. The panels are arranged from the left in descending order of absolute value of  $Z$  score. (*Lower panels:*) Group comparison of alpha-band regional dPTE (Figs. 4E and F). The comparisons at the ROIs providing provide clear discrimination between the groups ( $***p < 0.001$  in the permutation test) were depicted. The panels are arranged from the left in descending order of the absolute value of  $Z$  score (Fig. 4G).

information-network contribution to the clinical measures, but this is a future study.

### 6.3. Group comparisons of NPTE matrix, regional NPTE and dPTE

In the main text, we discussed the deviation of connectivity in people with TLE versus HCs by introducing the  $Z$  score based on the connectivity in the HC group. This treatment makes a little hard to see intra-group variability for the connectivity measures, especially for those in the HC group. In order to clear the intra-group variability, we here exemplify group comparisons of the measures for several ROIs or edges that show clear group differences, focusing on the alpha band. The variability was visually shown by violin plots using a Matlab tool for them (Bechtold, 2016).

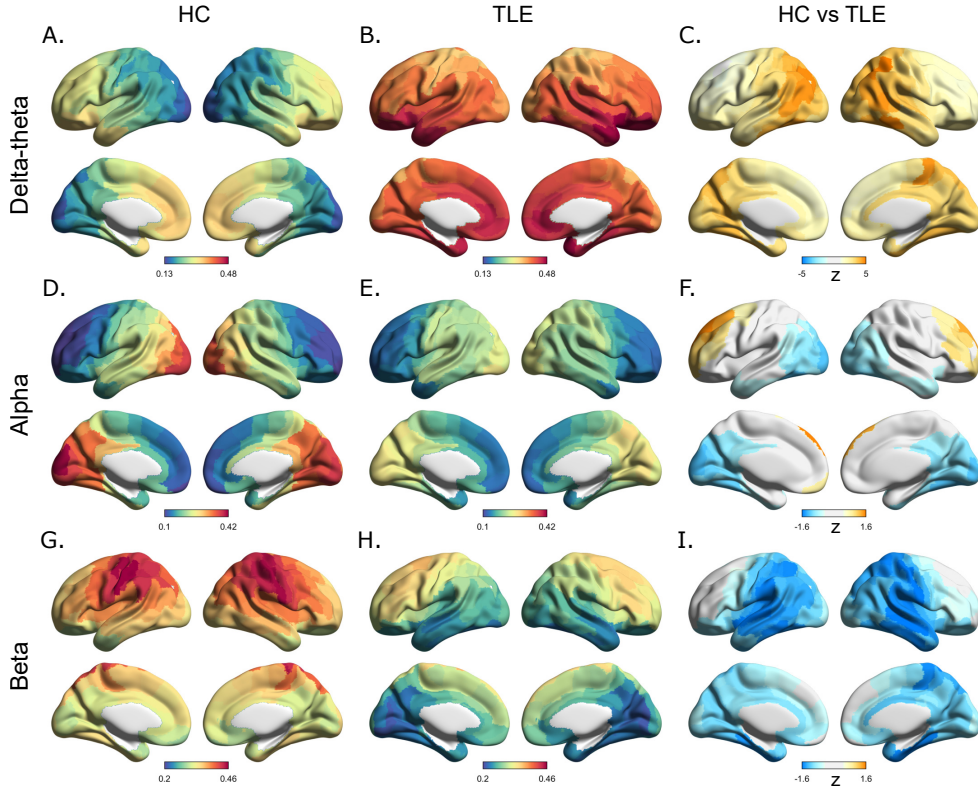

Figure S11: Relative-power spatial patterns for HC, TLE, and their difference represented as Z-score map for the delta-theta (A, B, and C), alpha (D, E, and F), and beta (G, H, and I) bands. The Z-score maps denote change in the relative-power pattern in TLE compared with HC-average pattern. The color in the Z-score maps represents mean Z scores thresholded by 5% FDR after permutation tests. Blue (orange) denote negative (resp. positive) change in relative power.

Figures S8 show group comparison of several components in the alpha-band NPTE matrix (see Figs. 2C and F). By comparing these figures with the connectogram (Fig. 2I), it is identified that a mean NPTE value for HC is larger (smaller) than that for TLE when mean Z is positive (resp. negative), which is along with the definition of Z score.

#### 6.4. Correlation between spatial patterns of dPTE and those of relative power

As we showed in the main text, the dPTE for HC had a clear posterior-to-anterior pattern in the alpha band (see Fig. 4E). The back-to-front pattern is visually like a well-known mean relative-power spatial pattern [see, e.g.,

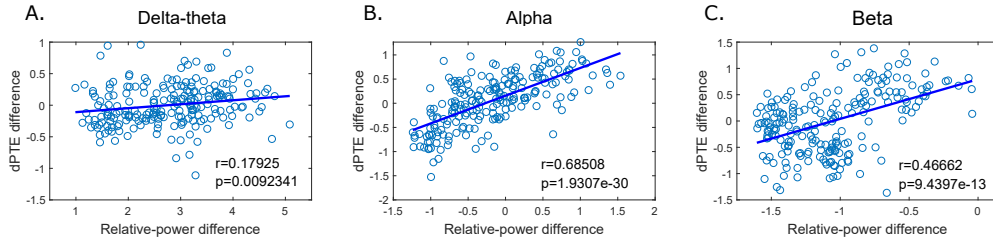

Figure S12: Similarity between group differences in regional dPTE values and those in the delta-theta (A), alpha (B), and beta (C) relative power.  $Z$  scores standardized by HC values [a standard definition was used here:  $Z = (w - w_{HC})/\sigma_{HC}$ , in which the multiplication of  $\text{sgn}(w_{HC})$  is not included] were computed for each ROI, and then the group differences were quantified by averaging the  $Z$  scores over TLE group. The number of circular dots is accordingly equal to that of ROIs, i.e., 210. The similarity was evaluated by computing Pearson’s correlation coefficient. A strong positive correlation ( $r \sim 0.7$ ) was observed in the alpha band.

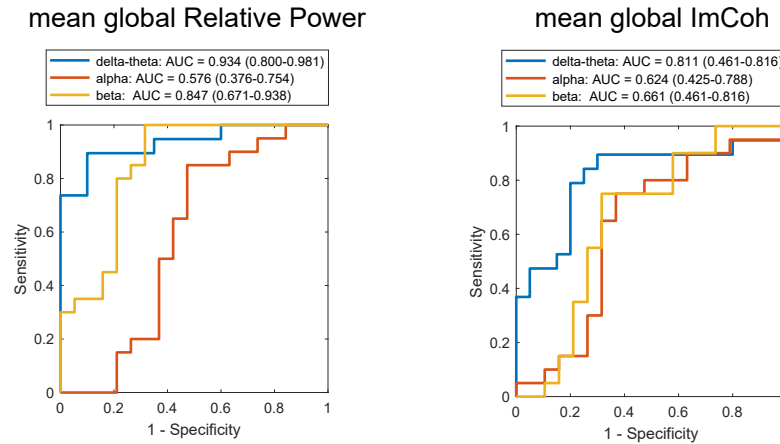

Figure S13: ROC curves of the global strength of relative power and ImCoh for the delta-theta, alpha, and beta bands.

Fig. 4 in Hillebrand et al. (2012)], and our HC data also provide such a back-to-front pattern in the alpha band (Fig. S11D). Theoretically, regional dPTE and relative power can be independent measures computed on a time-series since PTE measure is based on phase timecourse, in which signal amplitude is omitted. Nevertheless, we empirically investigated if regional spectral power was associated with regional dPTE. To our surprise, in the alpha and beta bands, but not delta, we found that the correlation between regional relative power and dPTE also showed a clear posterior-to-anterior pattern, a

pattern also observed in the regional spectral power (Fig. S11). Moreover, group differences in regional dPTE and relative power were correlated with each other especially for the alpha band (Fig. S12). These results suggest a complex relationship between spectral power and PTE measures.

### 6.5. Comparison of scalar measures as potential biomarkers

In the Supplementary section 6.1, we mentioned the alpha- and beta-band mean global  $|\text{dPTE}|$  have a potential to become a good scalar diagnostic measure for TLE. Here we compare them with the other scalar measures: mean global relative power and mean global ImCoh. ROC curve analysis was performed and the results are shown in Fig. S13. For the mean global relative power, their delta-theta- and beta-band measures exhibit good performance for TLE/HC discrimination. For the mean global ImCoh, its delta-theta-band quantity exhibits good performance.

Interestingly, the three scalar measures, mean global  $|\text{dPTE}|$ , relative power, and ImCoh were complementary to each other in terms of the frequency bands. This indicates that a combined use of total 9 scalar measures (the frequency bands  $\times$  the three measures) may provide a biomarker with high TLE/HC discrimination performance.

## 7. Cortical brain regions in the Brainnetome Atlas

The Brainnetome Atlas (Fan et al., 2016) was utilized in our atlas-based MEG analysis. The atlas is composed of 210 cortical regions and 36 sub-cortical regions. We focused on 210 cortical brain regions among the total 246 brain regions. Here we shows the list of the 210 cortical brain regions and their abbreviations we used (see Fan et al. (2016) for details); Table 1 is for label IDs from 1 to 108, and Table 2 is for label IDs from 109 to 210. The 210 regions are grouped into 20 modules, SFG, MFG, IFG, OrG, PrG, PCL, STG, MTG, ITG, FuG, PhG, pSTS, SPL, IPL, Pcun, PoG, INS, CG, MVOcC, and LOcC. The 20 modules are furthermore grouped into 6 lobes of the brain: Frontal (F), Temporal (T), Parietal (P), Insular (I), Limbic (L), and Occipital (O) lobes.

## References

Bechtold, B., 2016. Violin plots for matlab. Github Project, <https://github.com/bastibe/Violinplot-Matlab>, DOI: 10.5281/zenodo.4559847 .

- Campbell, R., 2016. notboxplot. Github Project, <https://github.com/raacampbell/notBoxPlot> .
- Fan, L., Li, H., Zhuo, J., Zhang, Y., Wang, J., Chen, L., Yang, Z., Chu, C., Xie, S., Laird, A.R., et al., 2016. The human brainnetome atlas: a new brain atlas based on connectional architecture. *Cerebral cortex* 26, 3508–3526.
- Guggisberg, A.G., Honma, S.M., Findlay, A.M., Dalal, S.S., Kirsch, H.E., Berger, M.S., Nagarajan, S.S., 2008. Mapping functional connectivity in patients with brain lesions. *Annals of neurology* 63, 193–203.
- Haller, M., Donoghue, T., Peterson, E., Varma, P., Sebastian, P., Gao, R., Noto, T., Knight, R.T., Shestyuk, A., Voytek, B., 2018. Parameterizing neural power spectra. *BioRxiv* , 299859.
- Hillebrand, A., Barnes, G.R., Bosboom, J.L., Berendse, H.W., Stam, C.J., 2012. Frequency-dependent functional connectivity within resting-state networks: an atlas-based meg beamformer solution. *Neuroimage* 59, 3909–3921.
- Mahjoory, K., Schoffelen, J.M., Keitel, A., Gross, J., 2020. The frequency gradient of human resting-state brain oscillations follows cortical hierarchies. *eLife* 9, e53715.
- Nolte, G., Bai, O., Wheaton, L., Mari, Z., Vorbach, S., Hallett, M., 2004. Identifying true brain interaction from eeg data using the imaginary part of coherency. *Clinical neurophysiology* 115, 2292–2307.
- Qin, G., Hotilovac, L., 2008. Comparison of non-parametric confidence intervals for the area under the roc curve of a continuous-scale diagnostic test. *Statistical Methods in Medical Research* 17, 207–221.
- Ranasinghe, K.G., Cha, J., Iaccarino, L., Hinkley, L.B., Beagle, A.J., Pham, J., Jagust, W.J., Miller, B.L., Rankin, K.P., Rabinovici, G.D., et al., 2020. Neurophysiological signatures in alzheimer’s disease are distinctly associated with tau, amyloid- $\beta$  accumulation, and cognitive decline. *Science translational medicine* 12.
- Rubinov, M., Sporns, O., 2010. Complex network measures of brain connectivity: uses and interpretations. *Neuroimage* 52, 1059–1069.



Table 1: Brain regions and their abbreviations in the Brainnetome Atlas (ID: 1-108). Abbreviations: lh, left hemisphere; rh, right hemisphere; MNI, Montreal Neurological Institute coordinates.

| lh.ID | rh.ID | Module                  | Abbreviation            | Regions                           | lh.MNI                | rh.MNI        |              |
|-------|-------|-------------------------|-------------------------|-----------------------------------|-----------------------|---------------|--------------|
| 1     | 2     | Superior Frontal Gyrus  | SFG A8m                 | medial area 8                     | -5, 15, 54            | 7, 16, 54     |              |
| 3     | 4     |                         | SFG A8dl                | dorsolateral area 8               | -18, 24, 53           | 22, 26, 51    |              |
| 5     | 6     |                         | SFG A9l                 | lateral area 9                    | -11, 49, 40           | 13, 48, 40    |              |
| 7     | 8     |                         | SFG A6dl                | dorsolateral area 6               | -18, -1, 65           | 20, 4, 64     |              |
| 9     | 10    |                         | SFG A6m                 | medial area 6                     | -6, -5, 58            | 7, -4, 60     |              |
| 11    | 12    | Middle Frontal Gyrus    | SFG A9m                 | medial area 9                     | -5, 36, 38            | 6, 38, 35     |              |
| 13    | 14    |                         | SFG A10m                | medial area 10                    | -8, 56, 15            | 8, 58, 13     |              |
| 15    | 16    |                         | MFG A9/46d              | dorsal area 9/46                  | -27, 43, 31           | 30, 37, 36    |              |
| 17    | 18    |                         | MFG IFJ                 | inferior frontal junction         | -42, 13, 36           | 42, 11, 39    |              |
| 19    | 20    |                         | MFG A46                 | area 46                           | -28, 56, 12           | 28, 55, 17    |              |
| 21    | 22    |                         | MFG A9/46v              | ventral area 9/46                 | -41, 41, 16           | 42, 44, 14    |              |
| 23    | 24    |                         | MFG A8vl                | ventrolateral area 8              | -33, 23, 45           | 42, 27, 39    |              |
| 25    | 26    |                         | MFG A6vl                | ventrolateral area 6              | -32, 4, 55            | 34, 8, 54     |              |
| 27    | 28    |                         | MFG A10l                | lateral area10                    | -26, 60, -6           | 25, 61, -4    |              |
| 29    | 30    |                         | Inferior Frontal Gyrus  | IFG A44d                          | dorsal area 44        | -46, 13, 24   | 45, 16, 25   |
| 31    | 32    | IFG IFS                 |                         | inferior frontal sulcus           | -47, 32, 14           | 48, 35, 13    |              |
| 33    | 34    | IFG A45c                |                         | caudal area 45                    | -53, 23, 11           | 54, 24, 12    |              |
| 35    | 36    | IFG A45r                |                         | rostral area 45                   | -49, 36, -3           | 51, 36, -1    |              |
| 37    | 38    | IFG A44op               |                         | opercular area 44                 | -39, 23, 4            | 42, 22, 3     |              |
| 39    | 40    | IFG A44v                |                         | ventral area 44                   | -52, 13, 6            | 54, 14, 11    |              |
| 41    | 42    | Orbital Gyrus           |                         | OrG A14m                          | medial area 14        | -7, 54, -7    | 6, 47, -7    |
| 43    | 44    |                         |                         | OrG A12/47o                       | orbital area 12/47    | -36, 33, -16  | 40, 39, -14  |
| 45    | 46    |                         | OrG A11l                | lateral area 11                   | -23, 38, -18          | 23, 36, -18   |              |
| 47    | 48    |                         | OrG A11m                | medial area 11                    | -6, 52, -19           | 6, 57, -16    |              |
| 49    | 50    |                         | OrG A13                 | area 13                           | -10, 18, -19          | 9, 20, -19    |              |
| 51    | 52    | Precentral Gyrus        | OrG A12/47l             | lateral area 12/47                | -41, 32, -9           | 42, 31, -9    |              |
| 53    | 54    |                         | PrG A4hf                | area 4 (head and face region)     | -49, -8, 39           | 55, -2, 33    |              |
| 55    | 56    |                         | PrG A6cdl               | caudal dorsolateral area 6        | -32, -9, 58           | 33, -7, 57    |              |
| 57    | 58    |                         | PrG A4ul                | area 4 (upper limb region)        | -26, -25, 63          | 34, -19, 59   |              |
| 59    | 60    |                         | PrG A4t                 | area 4 (trunk region)             | -13, -20, 73          | 15, -22, 71   |              |
| 61    | 62    |                         | PrG A4tl                | area 4 (tongue and larynx region) | -52, 0, 8             | 54, 4, 9      |              |
| 63    | 64    |                         | PrG A6cvl               | caudal ventrolateral area 6       | -49, 5, 30            | 51, 7, 30     |              |
| 65    | 66    |                         | PCL A1/2/3ll            | area 1/2/3 (lower limb region)    | -8, -38, 58           | 10, -34, 54   |              |
| 67    | 68    |                         | PCL A4ll                | area 4 (lower limb region)        | -4, -23, 61           | 5, -21, 61    |              |
| 69    | 70    |                         | Superior Temporal Gyrus | STG A38m                          | medial area 38        | -32, 14, -34  | 31, 15, -34  |
| 71    | 72    | STG A41/42              |                         | area 41/42                        | -54, -32, 12          | 54, -24, 11   |              |
| 73    | 74    | STG TE1.0 and TE1.2     |                         | TE1.0/TE1.2                       | -50, -11, 1           | 51, -4, -1    |              |
| 75    | 76    | STG A22c                |                         | caudal area 22                    | -62, -33, 7           | 66, -20, 6    |              |
| 77    | 78    | STG A38l                |                         | lateral area 38                   | -45, 11, -20          | 47, 12, -20   |              |
| 79    | 80    | Middle Temporal Gyrus   | STG A22r                | rostral area 22                   | -55, -3, -10          | 56, -12, -5   |              |
| 81    | 82    |                         | MTGs A21c               | caudal area 21                    | -65, -30, -12         | 65, -29, -13  |              |
| 83    | 84    |                         | MTGs A21r               | rostral area 21                   | -53, 2, -30           | 51, 6, -32    |              |
| 85    | 86    |                         | MTGs A37dl              | dorsolateral area37               | -59, -58, 4           | 60, -53, 3    |              |
| 87    | 88    |                         | MTGs aSTS               | anterior superior temporal sulcus | -58, -20, -9          | 58, -16, -10  |              |
| 89    | 90    | Inferior Temporal Gyrus | ITG A20iv               | intermediate ventral area 20      | -45, -26, -27         | 46, -14, -33  |              |
| 91    | 92    |                         | ITG A37elv              | extreme lateroventral area37      | -51, -57, -15         | 53, -52, -18  |              |
| 93    | 94    |                         | ITG A20r                | rostral area 20                   | -43, -2, -41          | 40, 0, -43    |              |
| 95    | 96    |                         | ITG A20il               | intermediate lateral area 20      | -56, -16, -28         | 55, -11, -32  |              |
| 97    | 98    |                         | ITG A37vl               | ventrolateral area 37             | -55, -60, -6          | 54, -57, -8   |              |
| 99    | 100   |                         | ITG A20cl               | caudolateral of area 20           | -59, -42, -16         | 61, -40, -17  |              |
| 101   | 102   |                         | ITG A20cv               | caudoventral of area 20           | -55, -31, -27         | 54, -31, -26  |              |
| 103   | 104   |                         | Fusiform Gyrus          | FuG A20rv                         | rostroventral area 20 | -33, -16, -32 | 33, -15, -34 |
| 105   | 106   |                         |                         | FuG A37mv                         | medioventral area37   | -31, -64, -14 | 31, -62, -14 |
| 107   | 108   |                         |                         | FuG A37lv                         | lateroventral area37  | -42, -51, -17 | 43, -49, -19 |

Table 2: Brain regions and their abbreviations in the Brainnetome Atlas (ID: 109-210). Abbreviations: lh, left hemisphere; rh, right hemisphere; MNI, Montreal Neurological Institute coordinates.

| lh.ID | rh.ID | Module                             | Abbreviation    | Regions                                           | lh.MNI        | rh.MNI       |
|-------|-------|------------------------------------|-----------------|---------------------------------------------------|---------------|--------------|
| 109   | 110   | Parahippocampal Gyrus              | PhG A35/36r     | rostral area 35/36                                | -27, -7, -34  | 28, -8, -33  |
| 111   | 112   |                                    | PhG A35/36c     | caudal area 35/36                                 | -25, -25, -26 | 26, -23, -27 |
| 113   | 114   |                                    | PhG TL          | area TL (lateral posterior parahippocampal gyrus) | -28, -32, -18 | 30, -30, -18 |
| 115   | 116   |                                    | PhG A28/34      | area 28/34 (EC entorhinal cortex)                 | -19, -12, -30 | 19, -10, -30 |
| 117   | 118   |                                    | PhG TI          | area TI (temporal agranular insular cortex)       | -23, 2, -32   | 22, 1, -36   |
| 119   | 120   |                                    | PhG TH          | area TH (medial PPHC)                             | -17, -39, -10 | 19, -36, -11 |
| 121   | 122   | posterior Superior Temporal Sulcus | pSTS rpSTS      | rostroposterior superior temporal sulcus          | -54, -40, 4   | 53, -37, 3   |
| 123   | 124   |                                    | pSTS cpSTS      | caudoposterior superior temporal sulcus           | -52, -50, 11  | 57, -40, 12  |
| 125   | 126   | Superior Parietal Lobule           | SPL A7r         | rostral area 7                                    | -16, -60, 63  | 19, -57, 65  |
| 127   | 128   |                                    | SPL A7c         | caudal area 7                                     | -15, -71, 52  | 19, -69, 54  |
| 129   | 130   |                                    | SPL A5l         | lateral area 5                                    | -33, -47, 50  | 35, -42, 54  |
| 131   | 132   |                                    | SPL A7pc        | postcentral area 7                                | -22, -47, 65  | 23, -43, 67  |
| 133   | 134   |                                    | SPL A7ip        | intraparietal area 7 (hIP3)                       | -27, -59, 54  | 31, -54, 53  |
| 135   | 136   | Inferior Parietal Lobule           | IPL A39c        | caudal area 39 (PGp)                              | -34, -80, 29  | 45, -71, 20  |
| 137   | 138   |                                    | IPL A39rd       | rostrodorsal area 39 (Hip3)                       | -38, -61, 46  | 39, -65, 44  |
| 139   | 140   |                                    | IPL A40rd       | rostrodorsal area 40 (PFt)                        | -51, -33, 42  | 47, -35, 45  |
| 141   | 142   |                                    | IPL A40c        | caudal area 40 (PFm)                              | -56, -49, 38  | 57, -44, 38  |
| 143   | 144   |                                    | IPL A39rv       | rostroventral area 39 (PGa)                       | -47, -65, 26  | 53, -54, 25  |
| 145   | 146   |                                    | IPL A40rv       | rostroventral area 40 (PFop)                      | -53, -31, 23  | 55, -26, 26  |
| 147   | 148   | Precuneus                          | PcunA7m         | medial area 7 (PEp)                               | -5, -63, 51   | 6, -65, 51   |
| 149   | 150   |                                    | PcunA5m         | medial area 5 (PEm)                               | -8, -47, 57   | 7, -47, 58   |
| 151   | 152   |                                    | PcundmPOS       | dorsomedial parietooccipital sulcus (PEr)         | -12, -67, 25  | 16, -64, 25  |
| 153   | 154   |                                    | PcunA31         | area 31 (Lc1)                                     | -6, -55, 34   | 6, -54, 35   |
| 155   | 156   | Postcentral Gyrus                  | PoG A1/2/3ulhf  | area 1/2/3 (upper limb, head and face region)     | -50, -16, 43  | 50, -14, 44  |
| 157   | 158   |                                    | PoG A1/2/3tonla | area 1/2/3 (tongue and larynx region)             | -56, -14, 16  | 56, -10, 15  |
| 159   | 160   |                                    | PoG A2          | area 2                                            | -46, -30, 50  | 48, -24, 48  |
| 161   | 162   |                                    | PoG A1/2/3tru   | area1/2/3 (trunk region)                          | -21, -35, 68  | 20, -33, 69  |
| 163   | 164   | Insular Gyrus                      | INS G           | hypergranular insula                              | -36, -20, 10  | 37, -18, 8   |
| 165   | 166   |                                    | INS v1a         | ventral agranular insula                          | -32, 14, -13  | 33, 14, -13  |
| 167   | 168   |                                    | INS d1a         | dorsal agranular insula                           | -34, 18, 1    | 36, 18, 1    |
| 169   | 170   |                                    | INS v1d/v1g     | ventral dysgranular and granular insula           | -38, -4, -9   | 39, -2, -9   |
| 171   | 172   |                                    | INS d1g         | dorsal granular insula                            | -38, -8, 8    | 39, -7, 8    |
| 173   | 174   |                                    | INS d1d         | dorsal dysgranular insula                         | -38, 5, 5     | 38, 5, 5     |
| 175   | 176   | Cingulate Gyrus                    | CG A23d         | dorsal area 23                                    | -4, -39, 31   | 4, -37, 32   |
| 177   | 178   |                                    | CG A24rv        | rostroventral area 24                             | -3, 8, 25     | 5, 22, 12    |
| 179   | 180   |                                    | CG A32p         | pregenual area 32                                 | -6, 34, 21    | 5, 28, 27    |
| 181   | 182   |                                    | CG A23v         | ventral area 23                                   | -8, -47, 10   | 9, -44, 11   |
| 183   | 184   |                                    | CG A24cd        | caudodorsal area 24                               | -5, 7, 37     | 4, 6, 38     |
| 185   | 186   |                                    | CG A23c         | caudal area 23                                    | -7, -23, 41   | 6, -20, 40   |
| 187   | 188   |                                    | CG A32sg        | subgenual area 32                                 | -4, 39, -2    | 5, 41, 6     |
| 189   | 190   | MedioVentral Occipital Cortex      | MVOcC cLinG     | caudal lingual gyrus                              | -11, -82, -11 | 10, -85, -9  |
| 191   | 192   |                                    | MVOcC rCunG     | rostral cuneus gyrus                              | -5, -81, 10   | 7, -76, 11   |
| 193   | 194   |                                    | MVOcC cCunG     | caudal cuneus gyrus                               | -6, -94, 1    | 8, -90, 12   |
| 195   | 196   |                                    | MVOcC rLinG     | rostral lingual gyrus                             | -17, -60, -6  | 18, -60, -7  |
| 197   | 198   |                                    | MVOcC vmPOS     | ventromedial parietooccipital sulcus              | -13, -68, 12  | 15, -63, 12  |
| 199   | 200   | Lateral Occipital Cortex           | LOcC mOccG      | middle occipital gyrus                            | -31, -89, 11  | 34, -86, 11  |
| 201   | 202   |                                    | LOcC V5/MT+     | area V5/MT+                                       | -46, -74, 3   | 48, -70, -1  |
| 203   | 204   |                                    | LOcC OPC        | occipital polar cortex                            | -18, -99, 2   | 22, -97, 4   |
| 205   | 206   |                                    | LOcC iOccG      | inferior occipital gyrus                          | -30, -88, -12 | 32, -85, -12 |
| 207   | 208   |                                    | LOcC msOccG     | medial superior occipital gyrus                   | -11, -88, 31  | 16, -85, 34  |
| 209   | 210   |                                    | LOcC lsOccG     | lateral superior occipital gyrus                  | -22, -77, 36  | 29, -75, 36  |
